# Supplementary material
Source: PubMed Central journal article supplement (PMC3543042)
Supplement: supp_M112.410241_jbc.M112.410241-1.pdf [file supp_M112.410241_jbc.M112.410241-1.pdf]

## Supplemental Data

**Table 1. Strains used in this study**

| Strain name | Genotype                                                                                                                                                                                                          | Derivations |
|-------------|-------------------------------------------------------------------------------------------------------------------------------------------------------------------------------------------------------------------|-------------|
| HYY1        | <i>h<sup>-</sup> leu1-32</i>                                                                                                                                                                                      | Our stock   |
| HYY8        | <i>h<sup>+</sup> cdc25-22 leu1-32</i>                                                                                                                                                                             | Our stock   |
| HYY71       | <i>h<sup>-</sup> clr3::kanMX leu1-32</i>                                                                                                                                                                          | M. Yanagida |
| HYY75       | <i>h<sup>-</sup> clr6-1 leu1-32</i>                                                                                                                                                                               | A. Klar     |
| HYY96       | <i>h<sup>-</sup> cdc10-129 leu1.32</i>                                                                                                                                                                            | Our stock   |
| HYY908      | <i>h<sup>+</sup> myc-ams2<sup>+</sup>::kanMX ade6-M216 leu1-32 ura4-D18</i>                                                                                                                                       | This study  |
| HYY909      | <i>h<sup>+</sup> myc-ams2dKm::kanMX ade6-M216 leu1-32 ura4-D18</i>                                                                                                                                                | This study  |
| HYY910      | <i>myc-ams2<sup>+</sup>::kanMX wee1-50 leu1-32</i>                                                                                                                                                                | This study  |
| HYY911      | <i>myc-ams2dKm::kanMX wee1-50 leu1-32</i>                                                                                                                                                                         | This study  |
| HYY952      | <i>h<sup>-</sup>/h<sup>-</sup> pat1-114/pat1-114 myc-ams2<sup>+</sup>::kanMX/myc-ams2<sup>+</sup>::kanMX ade6-M210/ade6-M216 leu1-32/leu1-32 ura4-D18/ ura4-D18</i>                                               | This study  |
| HYY953      | <i>h<sup>-</sup>/h<sup>-</sup> pat1-114/pat1-114 myc-ams2dKm::kanMX/myc-ams2dKm::kanMX ade6-M210/ade6-M216 leu1-32/leu1-32 ura4-D18/ura4-D18</i>                                                                  | This study  |
| HYY964      | <i>h<sup>-</sup> cds1::ura4<sup>+</sup> leu1-32 ura4-D18</i>                                                                                                                                                      | This study  |
| HYY1028     | <i>h<sup>-</sup>/h<sup>-</sup> pat1-114/pat1-114 myc-ams2<sup>+</sup>::kanMX/myc-ams2<sup>+</sup>::kanMX cds1::ura4<sup>+</sup>/cds1:: ura4<sup>+</sup> ade6-M210/ade6-M216 leu1-32/leu1-32 ura4-D18/ura4-D18</i> | This study  |
| HYY1029     | <i>h<sup>-</sup>/h<sup>-</sup> pat1-114/pat1-114 myc-ams2dKm::kanMX/myc-ams2dKm::kanMX cds1::ura4<sup>+</sup>/cds1::ura4<sup>+</sup> ade6-M210/ade6-M216 leu1-32/leu1-32 ura4-D18/ura4-D18</i>                    | This study  |
| HYY1030     | <i>h<sup>+</sup> hst2::kanMX ade6-M210 leu1-32 ura4-D18</i>                                                                                                                                                       | This study  |
| HYY1032     | <i>h<sup>+</sup> hst4::kanMX ade6-M210 leu1-32 ura4-D18</i>                                                                                                                                                       | This study  |
| HYY1047     | <i>h<sup>-</sup> hst2::kanMX myc-ams2dKm::kanMX ade6-M216 leu1-32 ura4-D18</i>                                                                                                                                    | This study  |
| HYY1051     | <i>h<sup>+</sup> hst4::kanMX myc-ams2dKm::kanMx ade6-M216 leu1-32 ura4-D18</i>                                                                                                                                    | This study  |
| HYY1054     | <i>h<sup>-</sup> pof3::natMX mat1m-cyhS smt0 rp142-cyhR ade6-M210 leu1-32 ura4-D18</i>                                                                                                                            | T. Toda     |
| HYY1058     | <i>h<sup>+</sup> hos2::hphMX ade6-M216 leu1-32 ura4-D18</i>                                                                                                                                                       | This study  |
| HYY1059     | <i>h<sup>+</sup> sir2::hphMX ade6-M216 leu1-32 ura4-D18</i>                                                                                                                                                       | This study  |
| HYY1065     | <i>pof3::natMX hst4::kanMX myc-ams2dKm::kanMX ade6-M210 leu1-32 ura4-D18</i>                                                                                                                                      | This study  |
| HYY1066     | <i>pof3::natMX hst4::kanMX ade6-M210 leu1-32 ura4-D18</i>                                                                                                                                                         | This study  |
| HYY1067     | <i>pof3::natMX myc-ams2dKm::kanMX ade6-M210 leu1-32 ura4-D18</i>                                                                                                                                                  | This study  |
| HYY1068     | <i>clr3::kanMX myc-ams2dKm::kanMX ade6-M216 leu1-32 ura4-D18</i>                                                                                                                                                  | This study  |
| HYY1069     | <i>clr6-1 myc-ams2dKm::kanMX leu1-32</i>                                                                                                                                                                          | This study  |
| HYY1071     | <i>hos2::hphMx myc-ams2dKm::kanMX ade6-M216 leu1-32 ura4-D18</i>                                                                                                                                                  | This study  |
| HYY1073     | <i>sir2::hphMX myc-ams2dKm::kanMX ade6-M216 leu1-32 ura4-D18</i>                                                                                                                                                  | This study  |
| HYY1075     | <i>h<sup>+</sup> chk1:: ura4<sup>+</sup> ade6-M210 leu1-32 ura4-D18</i>                                                                                                                                           | A. Carr     |
| HYY1080     | <i>chk1::ura4<sup>+</sup> myc-ams2dKm::KanMX ade6-M210 leu1-32 ura4-D18</i>                                                                                                                                       | This study  |
| HYY1081     | <i>chk1::ura4<sup>+</sup> hst4::kanMX ade6-M210 leu1-32 ura4-D18</i>                                                                                                                                              | This study  |
| HYY1082     | <i>chk1::ura4<sup>+</sup> hst4::kanMX myc-ams2dKm::kanMX ade6-M210 leu1-32 ura4-D18</i>                                                                                                                           | This study  |
| HYY1083     | <i>cds1::ura4<sup>+</sup> myc-ams2dKm::KanMX ade6-M210 leu1-32 ura4-D18</i>                                                                                                                                       | This study  |
| HYY1084     | <i>cds1::ura4<sup>+</sup> hst4::kanMX ade6-M210 leu1-32 ura4-D18</i>                                                                                                                                              | This study  |
| HYY1085     | <i>cds1::ura4<sup>+</sup> hst4::kanMX myc-ams2dKm::kanMX ade6-M210 leu1-32 ura4-D18</i>                                                                                                                           | This study  |
| HYY1094     | <i>pof3::natMx myc-ams2<sup>+</sup>::kanMX ade6-M210 leu1-32 ura4-D18</i>                                                                                                                                         | This study  |

|         |                                                                                                                                                                                                                         |            |
|---------|-------------------------------------------------------------------------------------------------------------------------------------------------------------------------------------------------------------------------|------------|
| HYY1097 | <i>h<sup>-</sup>/h<sup>-</sup> pat1-114/pat1-114 myc-ams2<sup>+</sup>:kanMX/ myc-ams2<sup>+</sup>:kanMX<br/>chk1::ura4<sup>+</sup>/chk1::ura4<sup>+</sup> ade6-M210/ade6-M216 leu1-32/leu1-32<br/>ura4-D18/ura4-D18</i> | This study |
| HYY1098 | <i>h<sup>-</sup>/h<sup>-</sup> pat1-114/pat1-114 myc-ams2dKm:KanMX/ myc-<br/>ams2dKm:KanMX chk1::ura4<sup>+</sup>chk1::ura4<sup>+</sup> ade6-M210/ade6-<br/>M216 leu1-32/leu1-32 ura4-D18/ura4-D18</i>                  | This study |
| HYY1115 | <i>hst4::kanMX myc-ams2<sup>+</sup>:kanMX ade6-M216 leu1-32 ura4-D18</i>                                                                                                                                                | This study |
| HYY1117 | <i>nrm1::hphMX myc-ams2<sup>+</sup>:kanMX leu1-32 ura4-D18</i>                                                                                                                                                          | This study |
| HYY1119 | <i>nrm1::hphMX myc-ams2dKm:kanMX leu1-32 ura4-D18</i>                                                                                                                                                                   | This study |
