# Supplementary material
Source: PubMed Central journal article supplement (PMC3543042)
Supplement: supp_M112.410241_jbc.M112.410241-2.pdf [file supp_M112.410241_jbc.M112.410241-2.pdf]

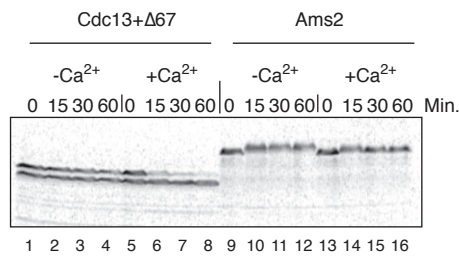

**Supplemental Figure S1. Ams2 is not a substrate of the APC/C-Cdc20**

Cdc20-dependent destruction assay reconstituted in *Xenopus* egg CSF extracts. <sup>35</sup>S-labelled in vitro translated Ams2 (lanes 9-16) and Cdc13 (lanes 1-8) were used as substrates. A version of Cdc13 lacking the N-terminal 67 residues (Δ67) was included with Cdc13 as a stable control. Samples were taken in the presence/absence of CaCl<sub>2</sub> at indicated time points. Addition of Ca<sup>2+</sup> induces the activation of APC/C-Cdc20 and initiates destruction.
