# Supplementary material
Source: PubMed Central journal article supplement (PMC3543042)
Supplement: supp_M112.410241_jbc.M112.410241-3.pdf [file supp_M112.410241_jbc.M112.410241-3.pdf]

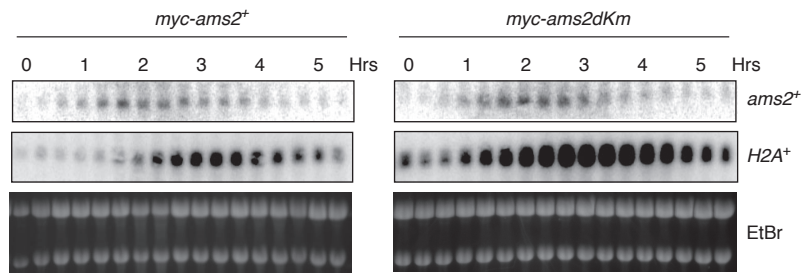

**Supplemental Figure S2. Ams2-dKm activates histone transcription from G1.** Northern blot analysis of cells expressing *myc-ams2<sup>+</sup>* and *myc-ams2-dKm* (as shown in Figure 2C). Nitrogen starved G1 arrested cells were released into the cell cycle by addition of  $\text{NH}_4\text{Cl}_2$ . Samples were taken every 20 minutes and mRNA levels of *ams2<sup>+</sup>* and histone *H2A<sup>+</sup>* were examined. EtBr acts as a loading control.
