# Supplementary material
Source: PubMed Central journal article supplement (PMC3543042)
Supplement: supp_M112.410241_jbc.M112.410241-5.pdf [file supp_M112.410241_jbc.M112.410241-5.pdf]

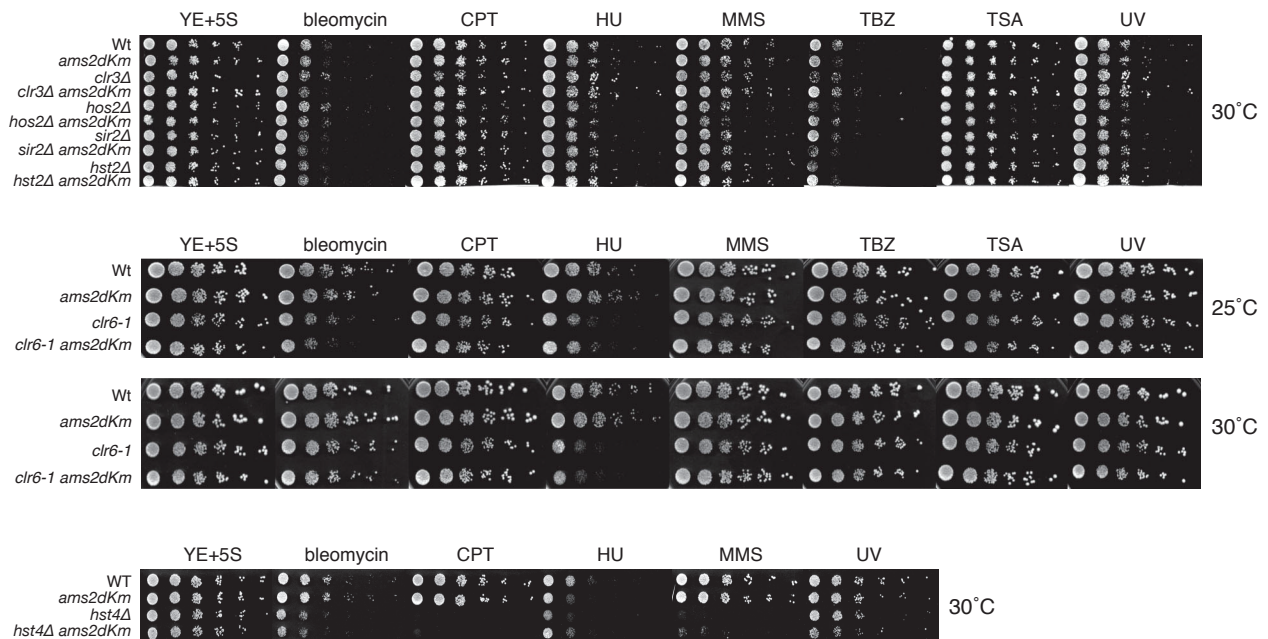

**Supplemental Figure S4. Sensitivity to DNA damaging agents of HDAC mutants and double mutants with *ams2-dKm*.**

(Top panel) Asynchronous wild-type (HYY908), *ams2-dKm* (HYY909), *clr3Δ* (HYY71), *clr3Δams2-dKm* (HYY1068), *hos2Δ* (HYY1058), *hos2Δams2-dKm* (HYY1071), *sir2Δ* (HYY1059), *sir2Δams2-dKm* (HYY1073), *hst2Δ* (HYY1030) and *hst2Δams2-dKm* (HYY1047) cells were spotted with decreasing cell number onto rich medium containing DNA damaging agents, and incubated at 30°C for 4 days. Bleomycin (4μg/ml), 10 μM camptothecin (CPT), 6 mM hydroxyurea (HU), 0.005% MMS, 12.5 μg/ml thiabendazole (TBZ), 12.5 μg/ml trichostatin A (TSA) and 150 J/m<sup>2</sup> UV were used as DNA damaging agents. (Middle panels) Same as above, but wild-type (HYY908), *ams2-dKm* (HYY909), *clr6-1* (HYY75) and *clr6-1ams2-dKm* (HYY1069) cells were grown at the indicated temperatures for 4 days (30°C) or 6 days (25°C). 6 mM CPT, instead of 10 mM CPT, was used as *clr6-1* showed poor growth on 10mM. (Bottom panel) Same as above, but *hst4Δ* (HYY1032) and *hst4Δams2-dKm* (HYY1051) were used and incubated at 30°C for 4 days.
