# Supplementary material
Source: PubMed Central journal article supplement (PMC3543042)
Supplement: supp_M112.410241_jbc.M112.410241-6.pdf [file supp_M112.410241_jbc.M112.410241-6.pdf]

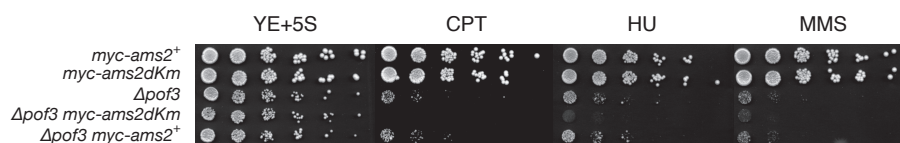

**Supplemental Figure S5. Effects of stability of Ams2 on genotoxic stresses.**

Asynchronous WT *myc-ams2<sup>+</sup>* (HYY908), *myc-ams2-dKm* (HYY909), *pof3 $\Delta$*  (HYY1054), *pof3 $\Delta$ myc-ams2-dKm* (HYY1067) and *pof3 $\Delta$ myc-ams2<sup>+</sup>* (HYY1094) cells were spotted with decreasing cell number onto rich medium containing various DNA damaging agents and incubated at 30°C for 4 days. 4  $\mu$ M camptothecin (CPT), 3 mM hydroxyurea (HU) and 0.005% MMS were used as DNA damaging agents.
