# Supplementary material
Source: PubMed Central journal article supplement (PMC3543042)
Supplement: supp_M112.410241_jbc.M112.410241-7.pdf [file supp_M112.410241_jbc.M112.410241-7.pdf]

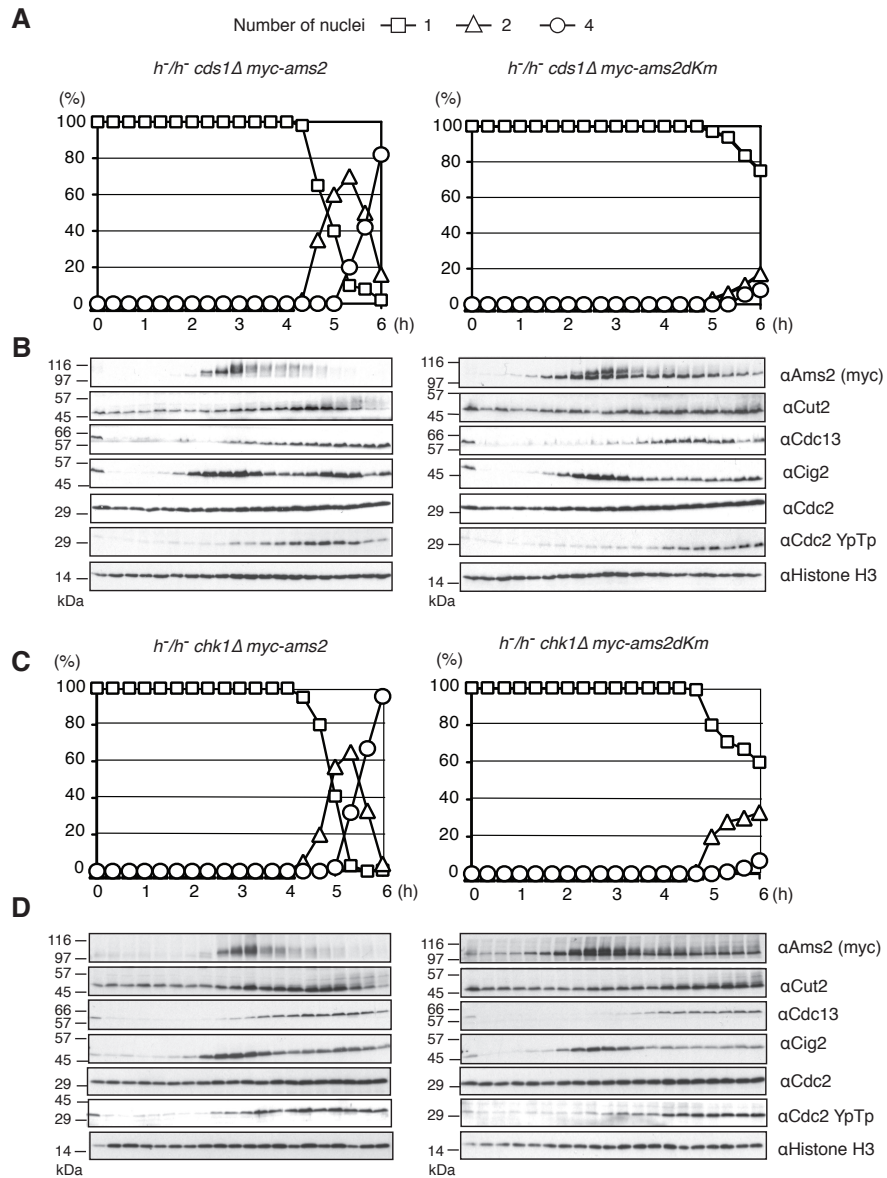

**Supplemental Figure S6. Meiotic S phase delay in *ams2-dKm* is neither dependent on Cds1 nor Chk1.**

Meiosis was induced by thermal inactivation of Pat1 and meiotic progression was monitored in *cds1Δ myc-ams2<sup>+</sup>* (HYY1028) and *cds1Δ myc-ams2-dKm* (HYY1029) diploid cells. Samples were examined microscopically for the number of nuclei in a cell to monitor progression through meiosis (A) and analyzed by immunoblotting using specific antibodies every 20 minutes (B). C, D, Same as A and B, but *chk1Δ myc-ams2<sup>+</sup>* (HYY1097) and *chk1Δ myc-ams2-dKm* (HYY1098) were used.
