# Supplementary material
Source: PubMed Central journal article supplement (PMC3543042)
Supplement: supp_M112.410241_jbc.M112.410241-8.pdf [file supp_M112.410241_jbc.M112.410241-8.pdf]

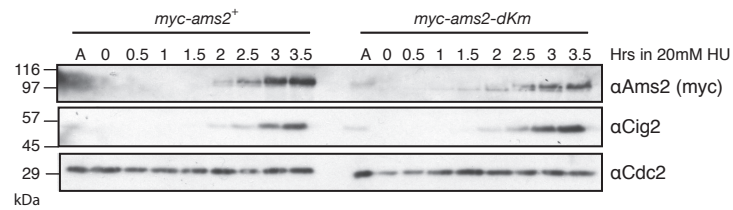

**Supplemental Figure S7. A feedback mechanism to monitor Ams2 levels in G1.** WT *myc-ams2<sup>+</sup>* (HYY908) and *myc-ams2-dKm* (HYY909) cells were arrested in G1 by nitrogen starvation and released to medium with nitrogen and 20 mM HU. Samples were taken at the indicated time points and analysed by immunoblotting. Asynchronous culture (shown as A) of both cells was used as a control.
