# Supplementary material
Source: PubMed Central journal article supplement (PMC3543042)
Supplement: supp_M112.410241_jbc.M112.410241-9.pdf [file supp_M112.410241_jbc.M112.410241-9.pdf]

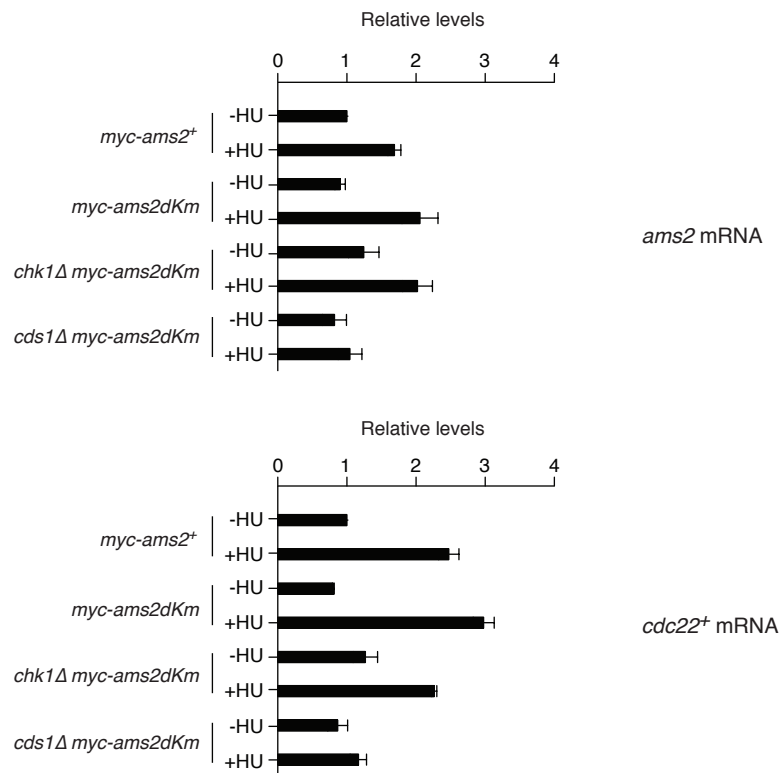

**Supplemental Figure S8. HU activates transcription of *ams2* and *cdc22* regardless of the presence or absence of *chk1<sup>+</sup>*.**

WT *myc-ams2<sup>+</sup>* (HYY908), *myc-ams2-dKm* (HYY909), *chk1Δ myc-ams2-dKm* (HYY1080) and *cds1Δ myc-ams2-dKm* (HYY1083) were grown in the presence/absence of HU (for 4 hours) and total RNA was isolated. *ams2* and *cdc22<sup>+</sup>* mRNA levels were determined by qPCR and relative levels compared with *myc-ams2<sup>+</sup>* strain in the absence of HU are presented. *act1<sup>+</sup>* mRNA was used for normalization. Error bars, s.e.m. from two independent experiments
